# Supplementary material
Source: publisher figshare collection journal article supplement (https://acs.figshare.com/ndownloader/files/25491503)
Supplement: Supplementary file 1 [file 25491503]

## Supporting Information

### **Ultra-stretchable, tough, anti-freezing and conductive cellulose hydrogel for wearable strain sensor**

Daijun Chen<sup>a</sup>, Xiaoli Zhao<sup>a</sup>, Xinran Wei<sup>a</sup>, Jialin Zhang<sup>a</sup>, Dan Wang<sup>a</sup>, Hao Lu<sup>b</sup>, Pengxiang Jia<sup>a\*</sup>

<sup>a</sup>*Key Laboratory of Synthetic and Natural Functional Molecule of Ministry of Education, College of Chemistry and Materials Science, Northwest University, Xi'an, Shaanxi 710127, China*

<sup>b</sup>*Max Planck Institute for Polymer Research, Ackermannweg 10, 55128 Mainz, Germany*

#### **Corresponding Author**

pxjia@nwu.edu.cn (P. Jia)

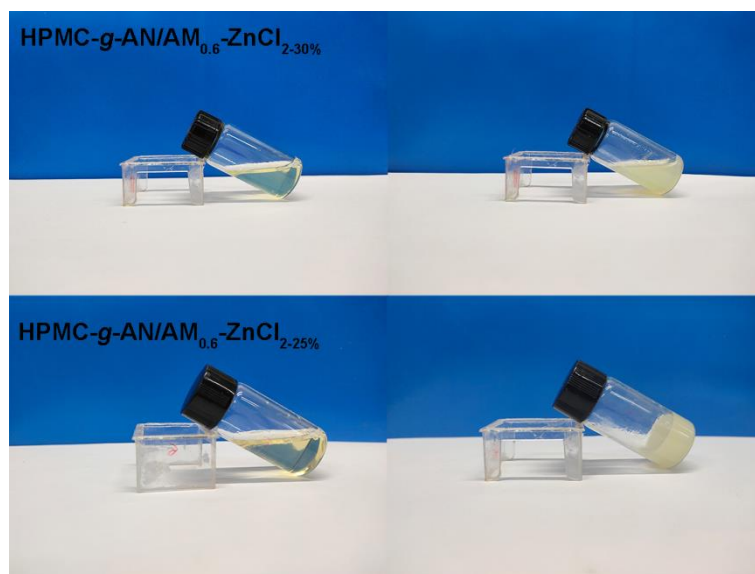

**Figure S1.** Images of HPMC-g-AN/AM<sub>0.6</sub>-ZnCl<sub>2</sub>-30% (top) and HPMC-g-AN/AM<sub>0.6</sub>-ZnCl<sub>2</sub>-25% (bottom) sample before and after grafting polymerization.

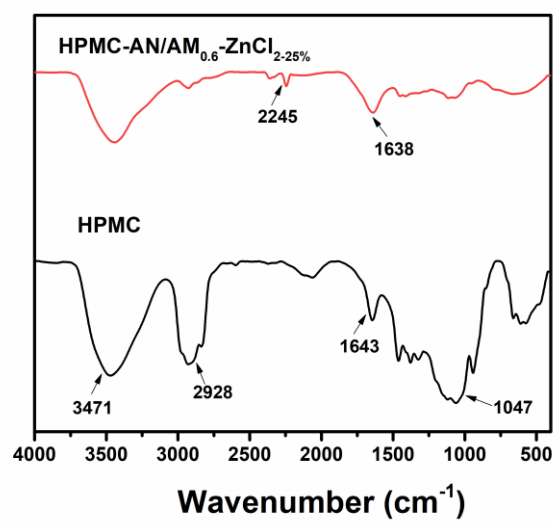

**Figure S2.** The FTIR spectra of HPMC-g-AN/AM<sub>0.6</sub>-ZnCl<sub>2</sub>-25% and HPMC.

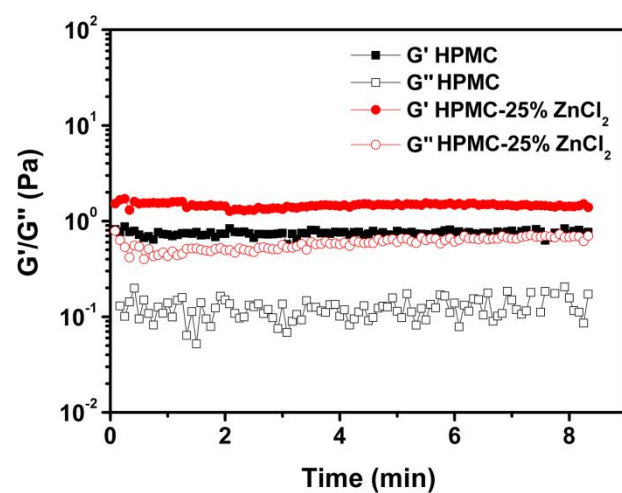

**Figure S3.** Rheological behavior of the HPMC and HPMC-25% ZnCl<sub>2</sub> solution.

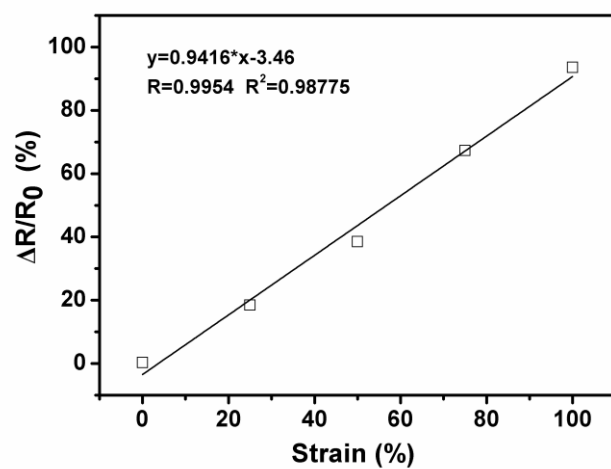

**Figure S4.** The plots of the relative variation of resistance as a function of strain.
